# Supplementary material
Source: PubMed Central journal article supplement (PMC5527914)

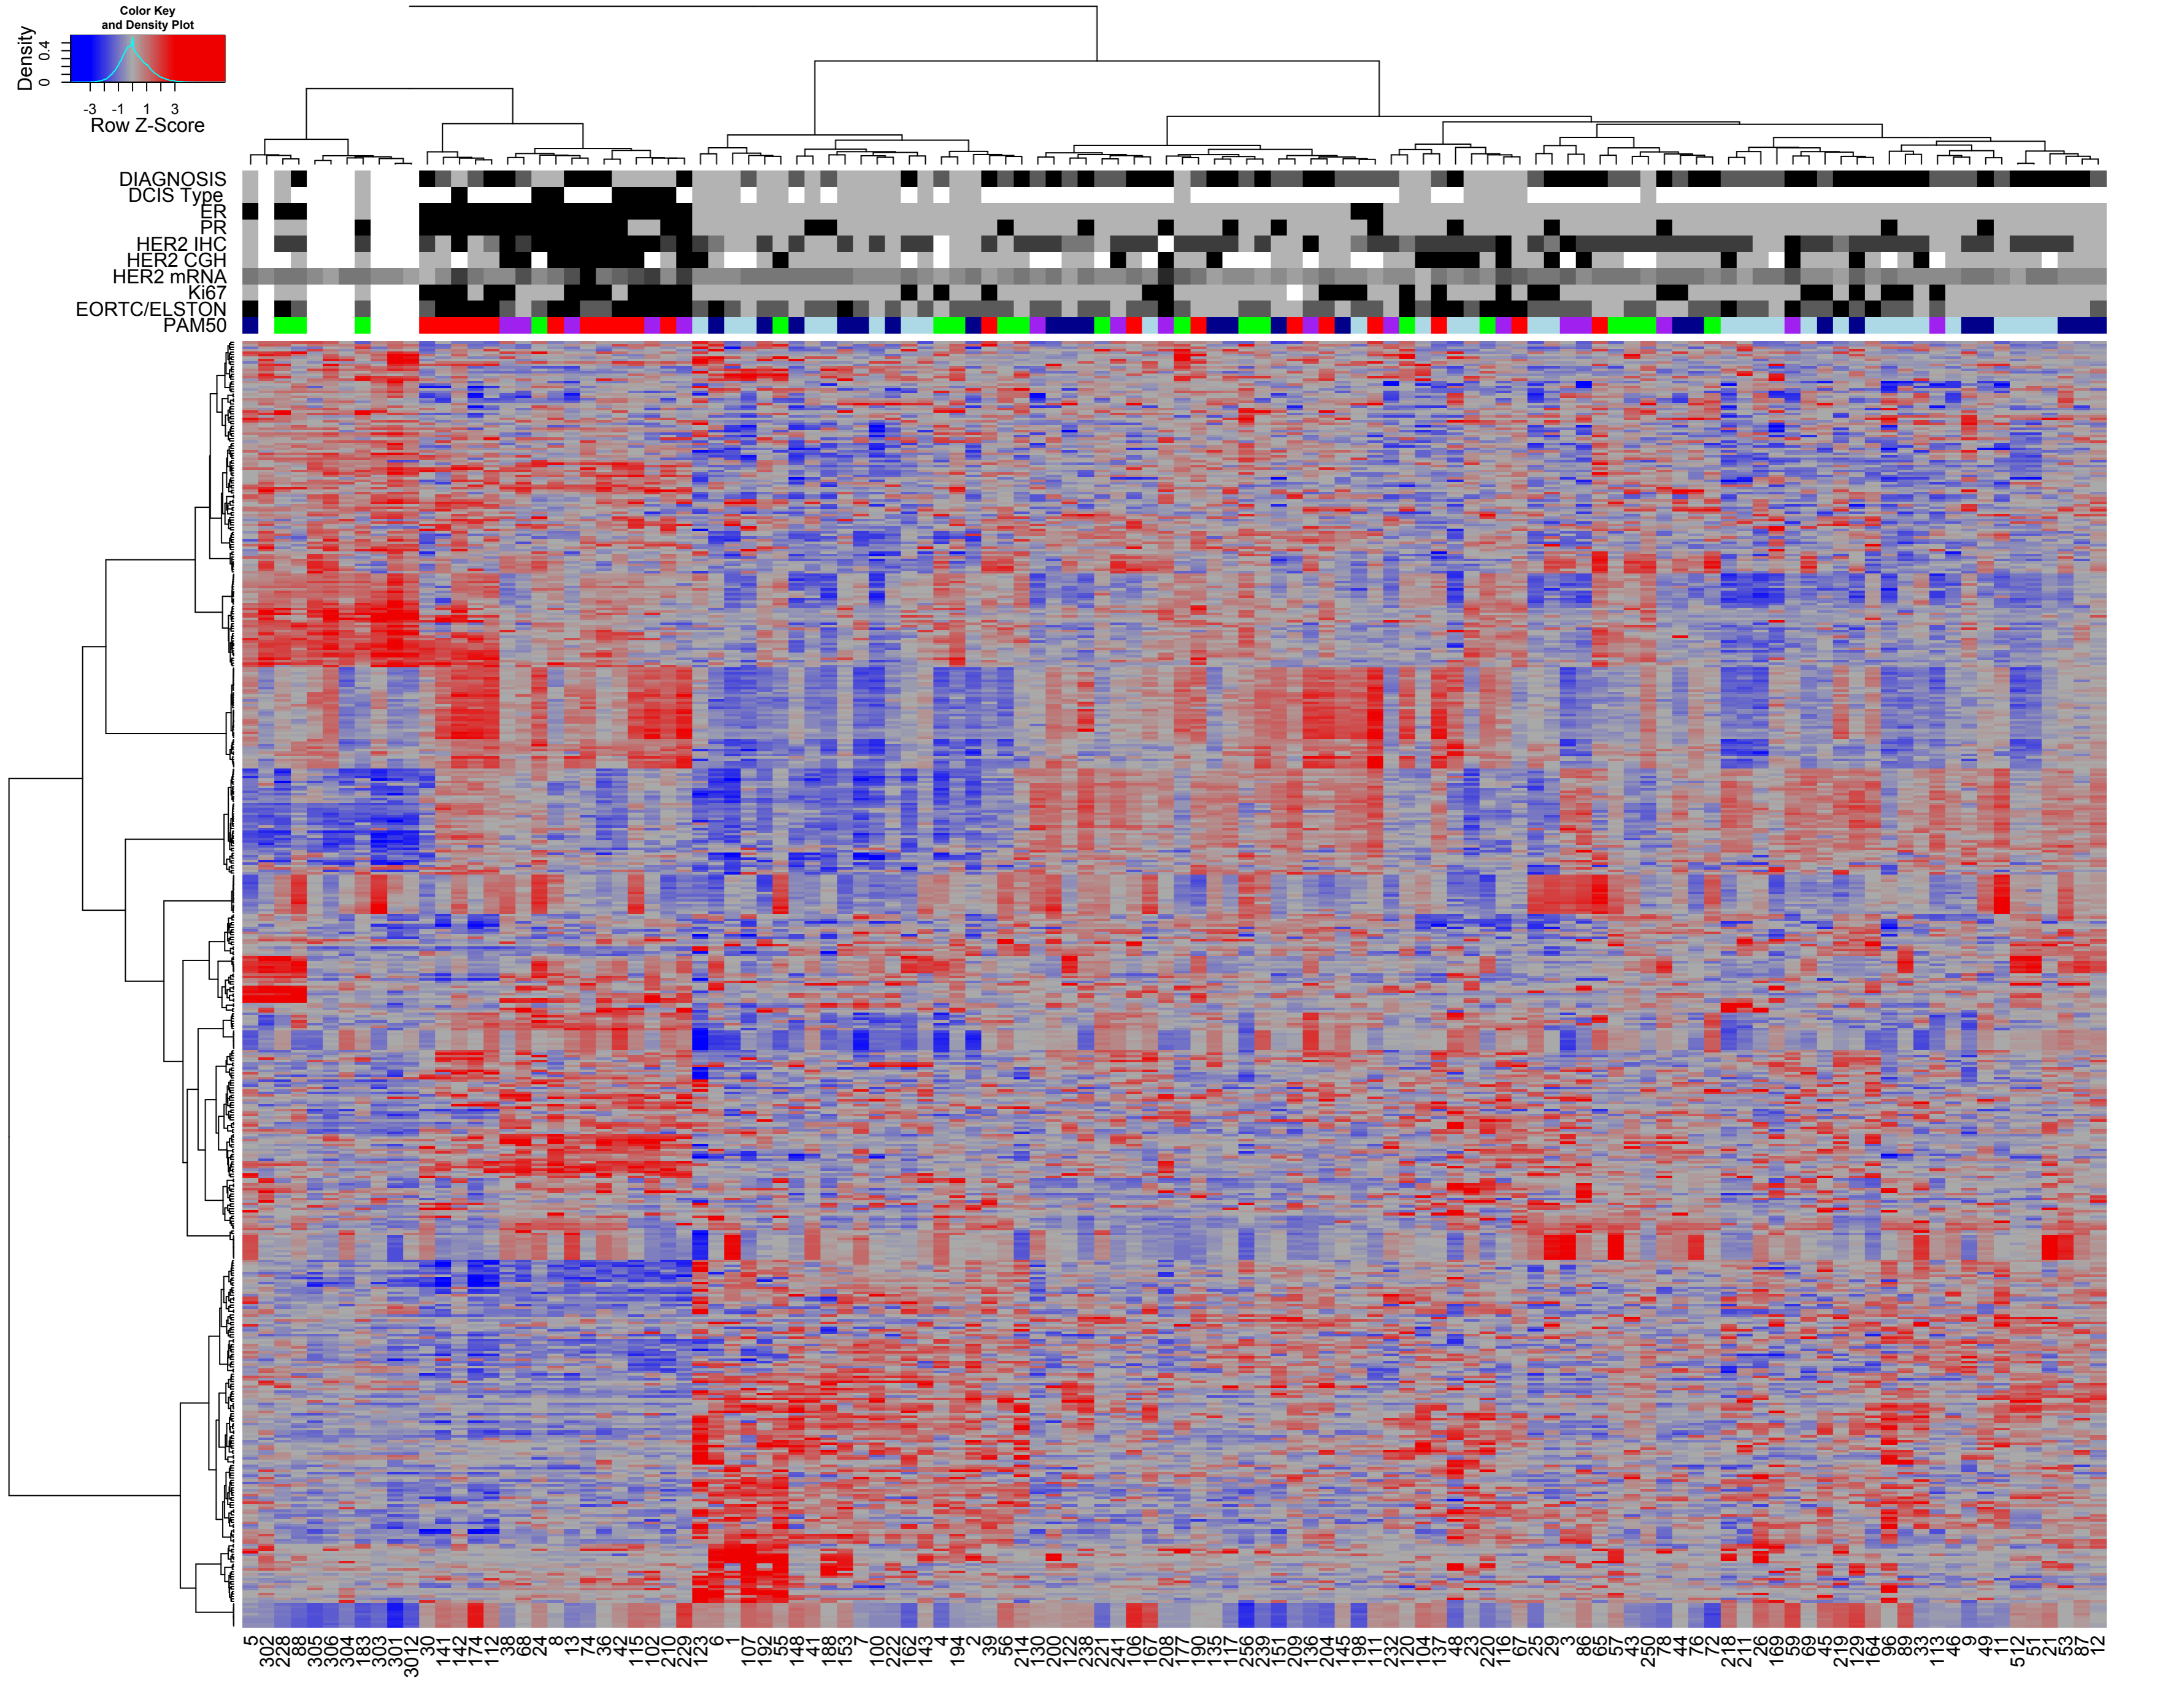

Supplement: MOL2-4-357-s002.pdf [file MOL2-4-357-s002.pdf]
